# Supplementary material for: Transcriptomic profiling of sporadic Alzheimer’s disease patients
Source: PubMed Central journal article supplement (PMC9559068; doi:10.1186/s13041-022-00963-2), 2022-10-12
Supplement: 13041_2022_963_MOESM1_ESM.pdf [file 13041_2022_963_MOESM1_ESM.pdf]

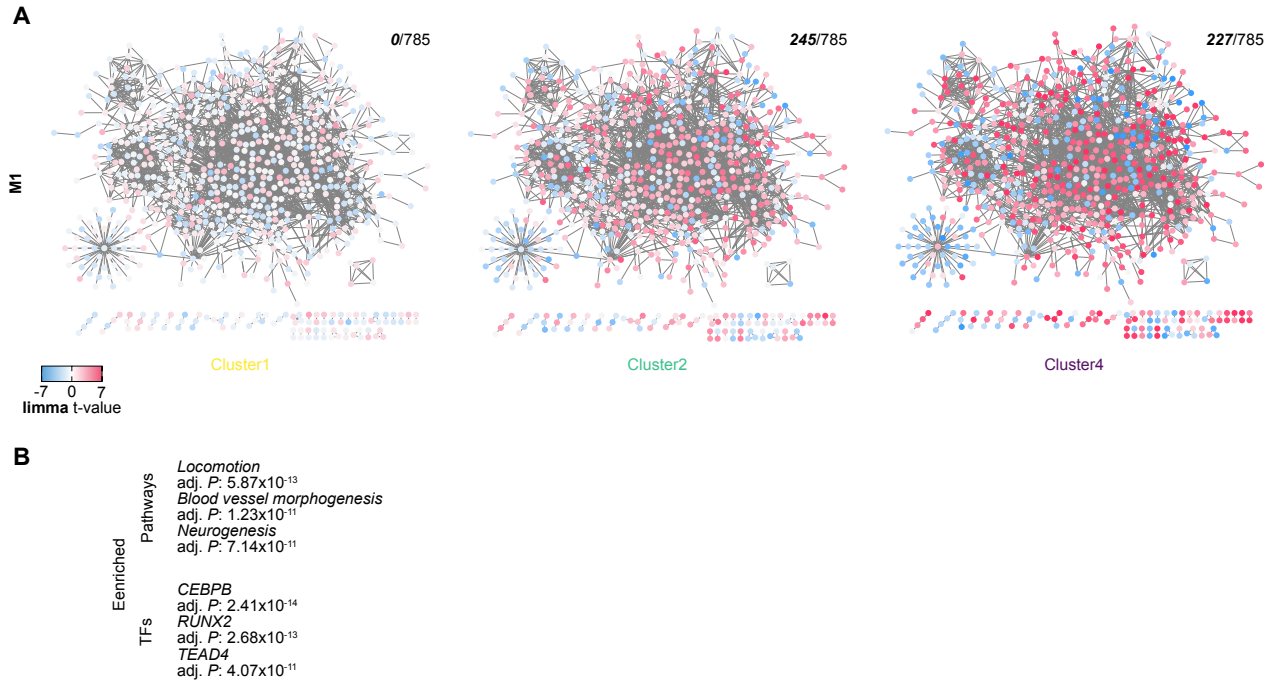

**Figure S1**

**A.** StringDB PPI interaction networks for module M1 across the three clusters; genes color-coded by limma t-value; upper right subpanel indicates number of DEGs within the module for each AD cluster. **B.** Highly enriched pathways and TFs for each comodule (hypergeometric test).

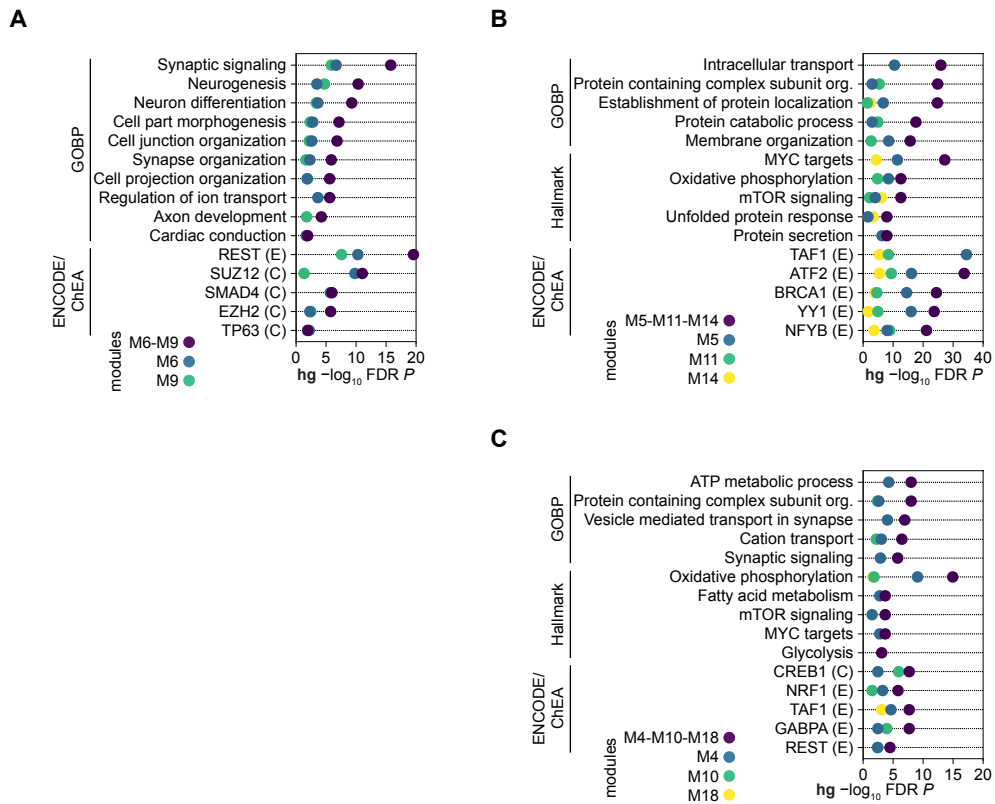

**Figure S2**

**A-C** Hypergeometric enrichment (hg) of modules and combined comodules using the Gene Ontology – Biological Process (GOBP), Hallmark, and ENCODE-ChEA Consensus databases for comodule **A** M6-M9, **B** M5-M11-M14, **C** M4-M10-M18.
